# Supplementary figures and images for: Combination of gemcitabine and anti-PD-1 antibody enhances the anticancer effect of M1 macrophages and the Th1 response in a murine model of pancreatic cancer liver metastasis
Source: PubMed Central journal article supplement — J Immunother Cancer. 2020 Nov 13;8(2):e001367. doi: 10.1136/jitc-2020-001367 (PMC7668383; doi:10.1136/jitc-2020-001367), 2020-11-13

# Supplementary Figure S1

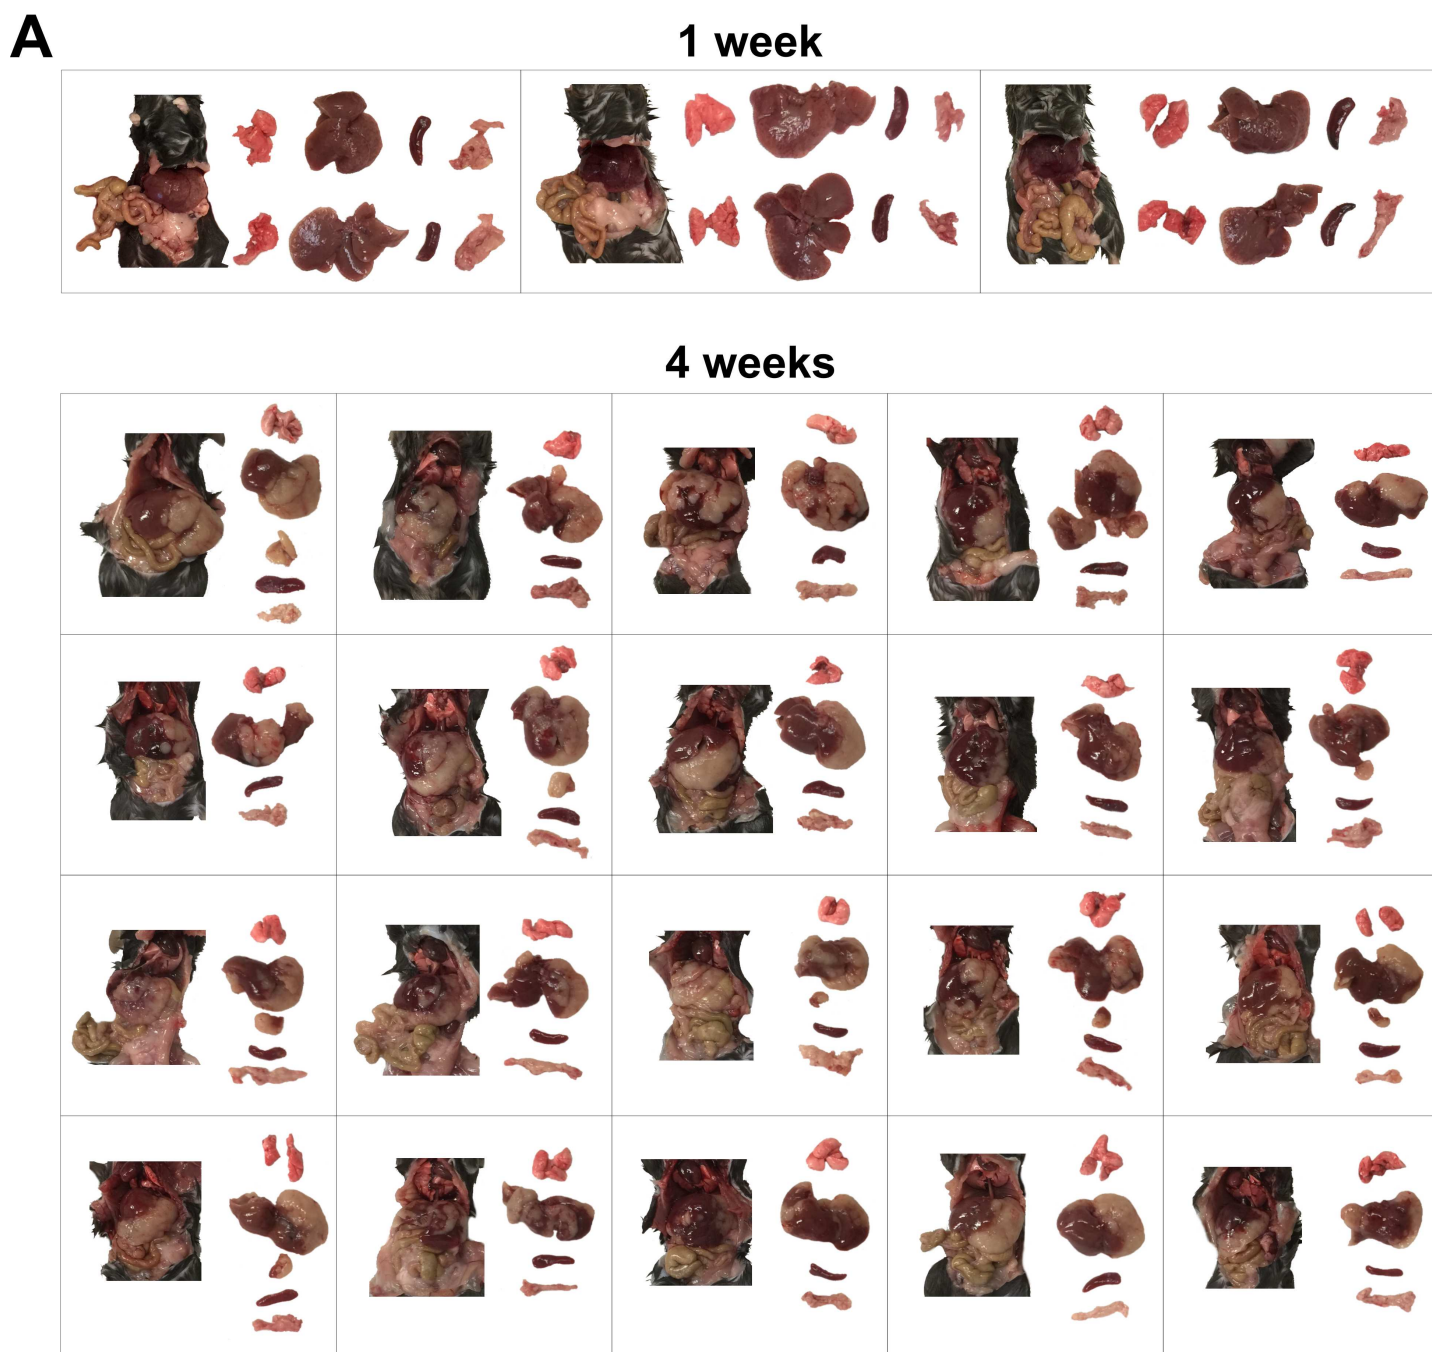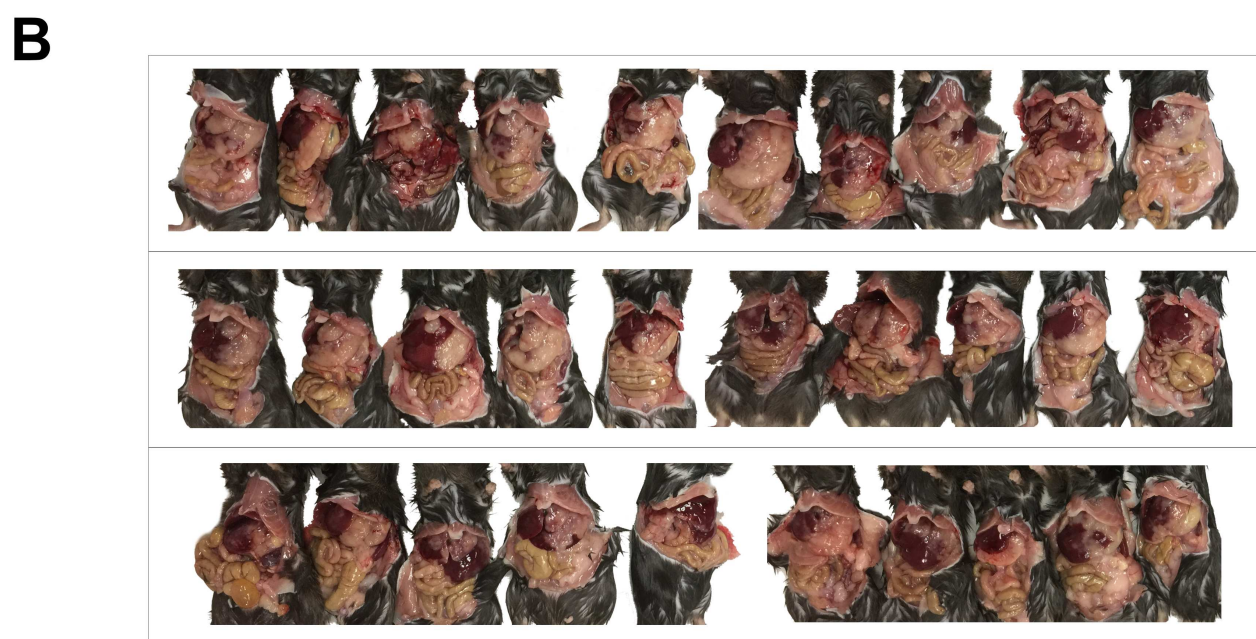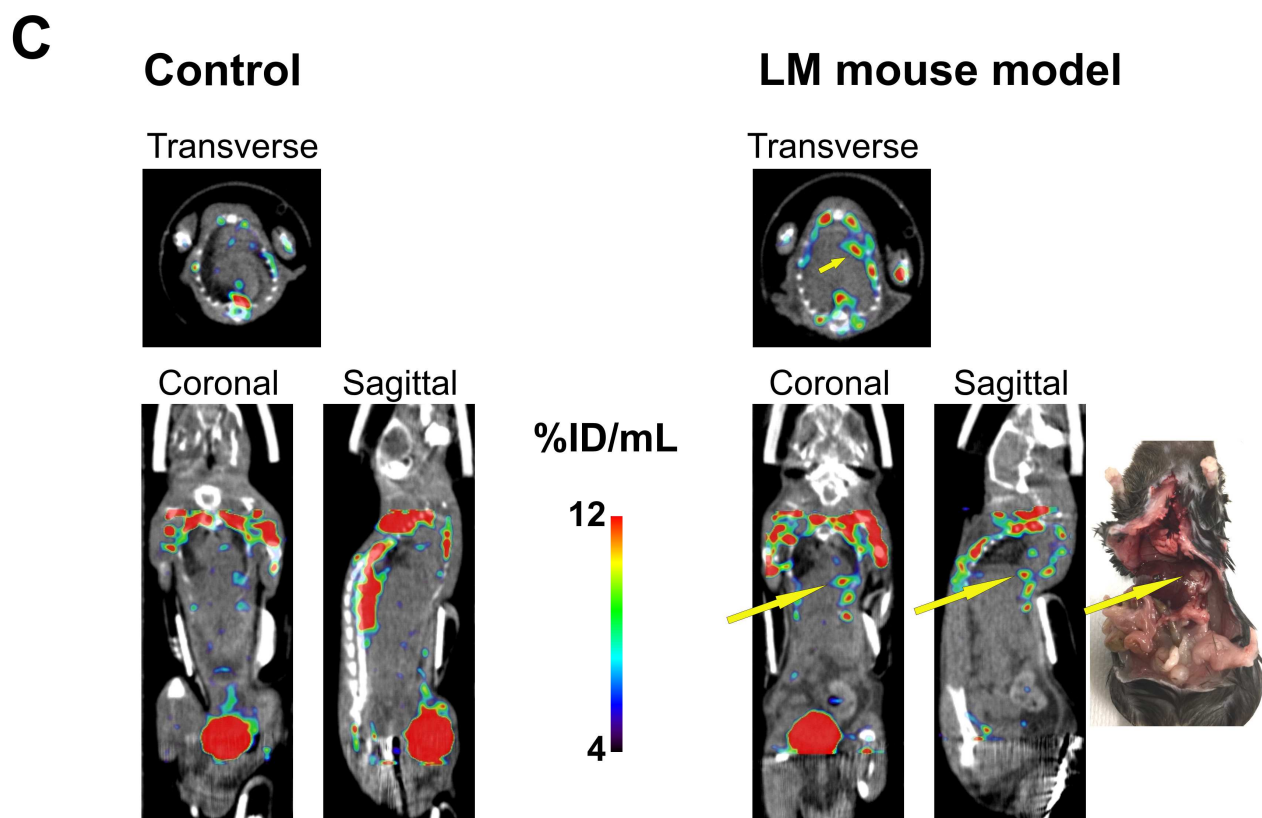

Supplement: jitc-2020-001367supp001.pdf [file jitc-2020-001367supp001.pdf]

## Supplementary Figure S2

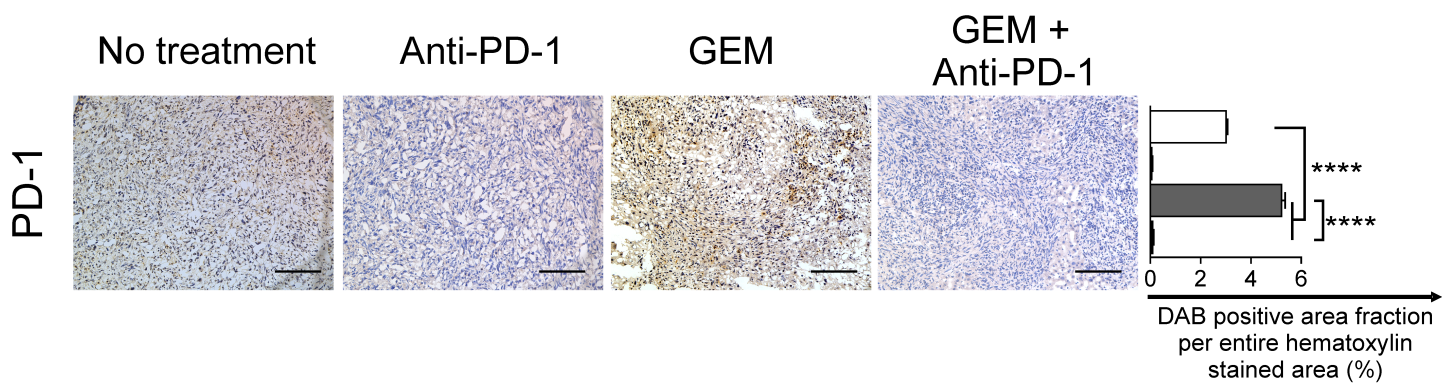

Supplement: jitc-2020-001367supp002.pdf [file jitc-2020-001367supp002.pdf]

# Supplementary Figure S3

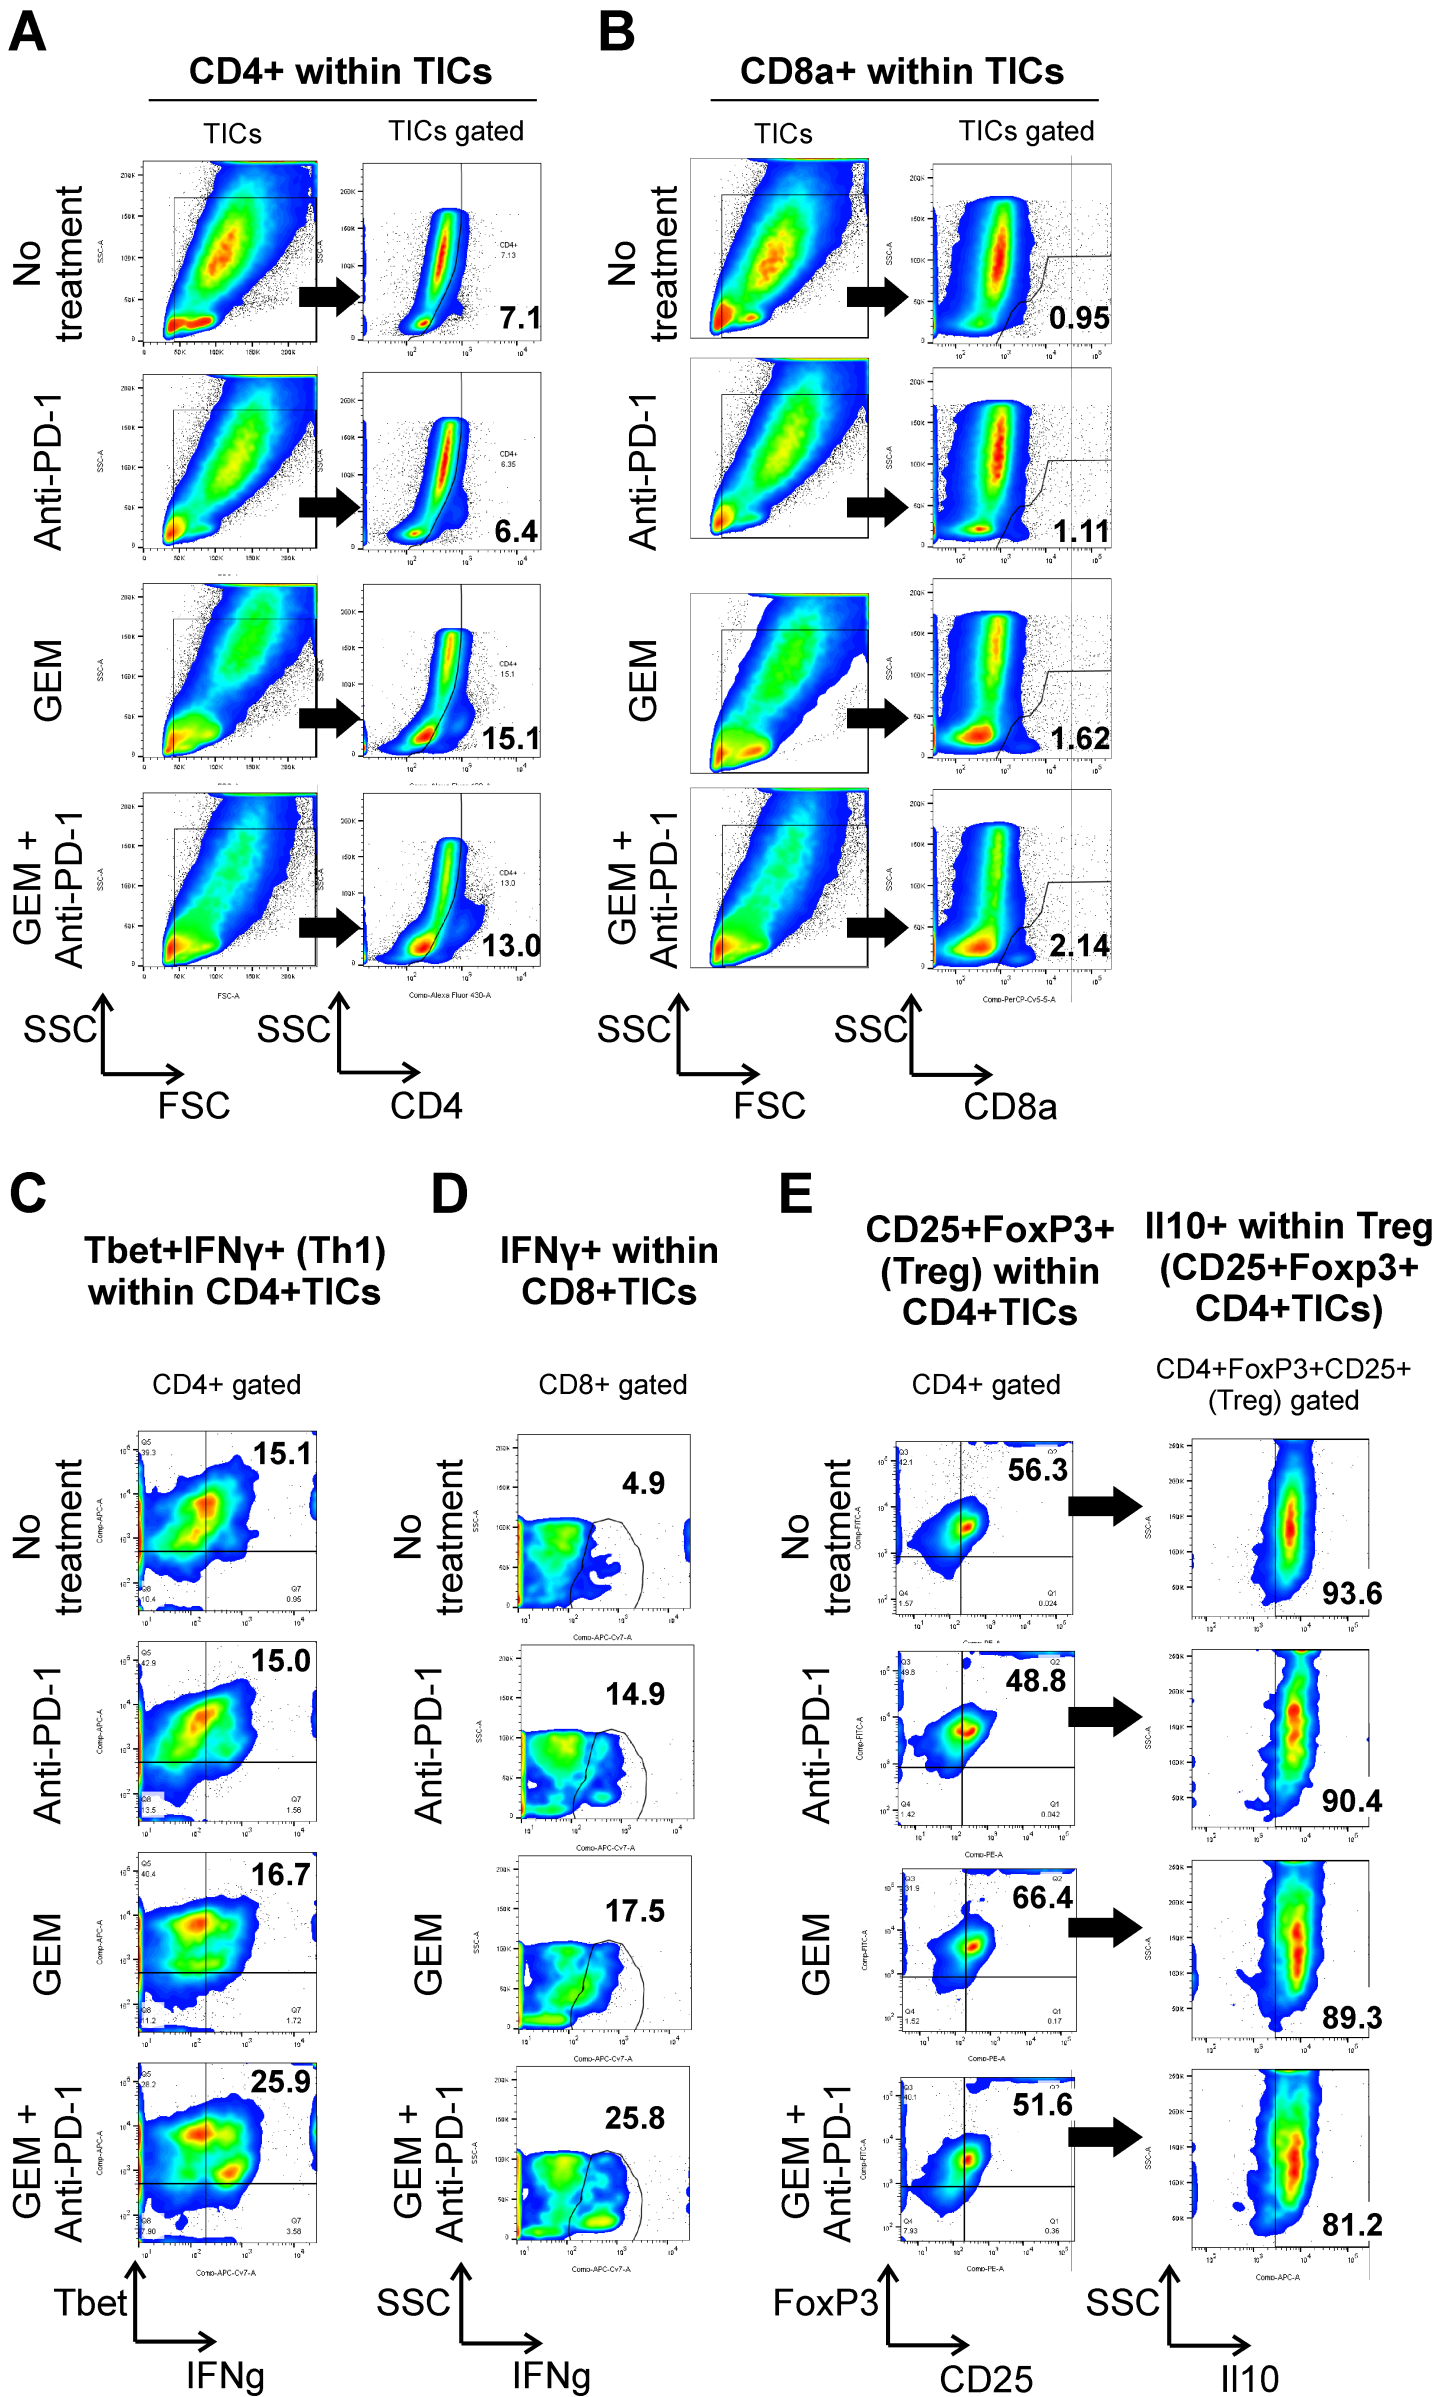

Supplement: jitc-2020-001367supp003.pdf [file jitc-2020-001367supp003.pdf]

## Supplementary Figure S4

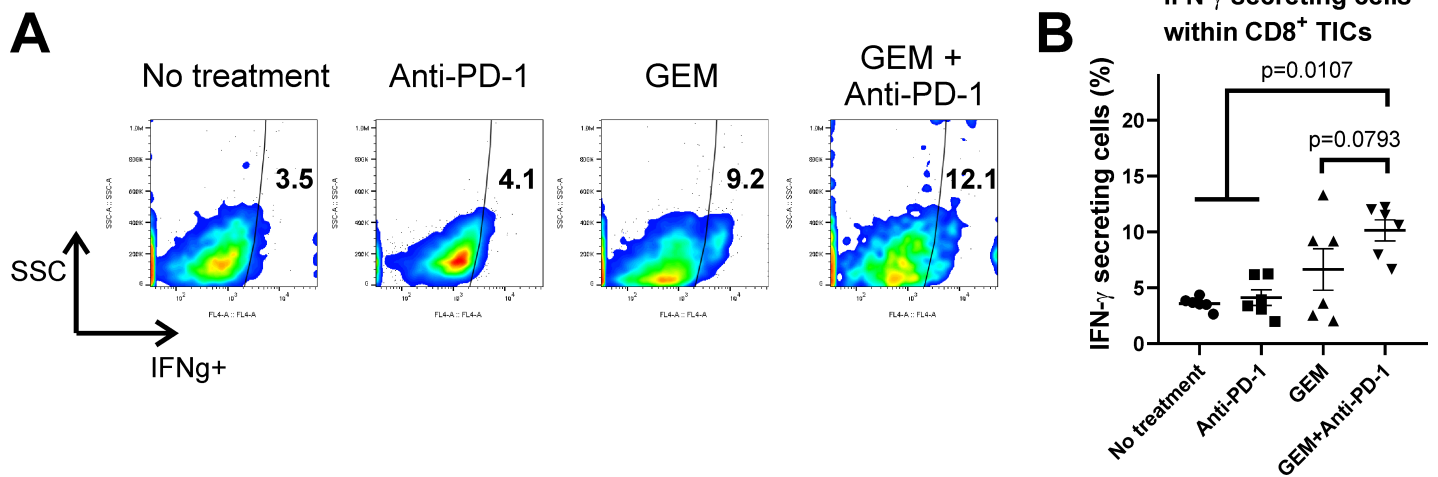

Supplement: jitc-2020-001367supp004.pdf [file jitc-2020-001367supp004.pdf]

# Supplementary Figure S6

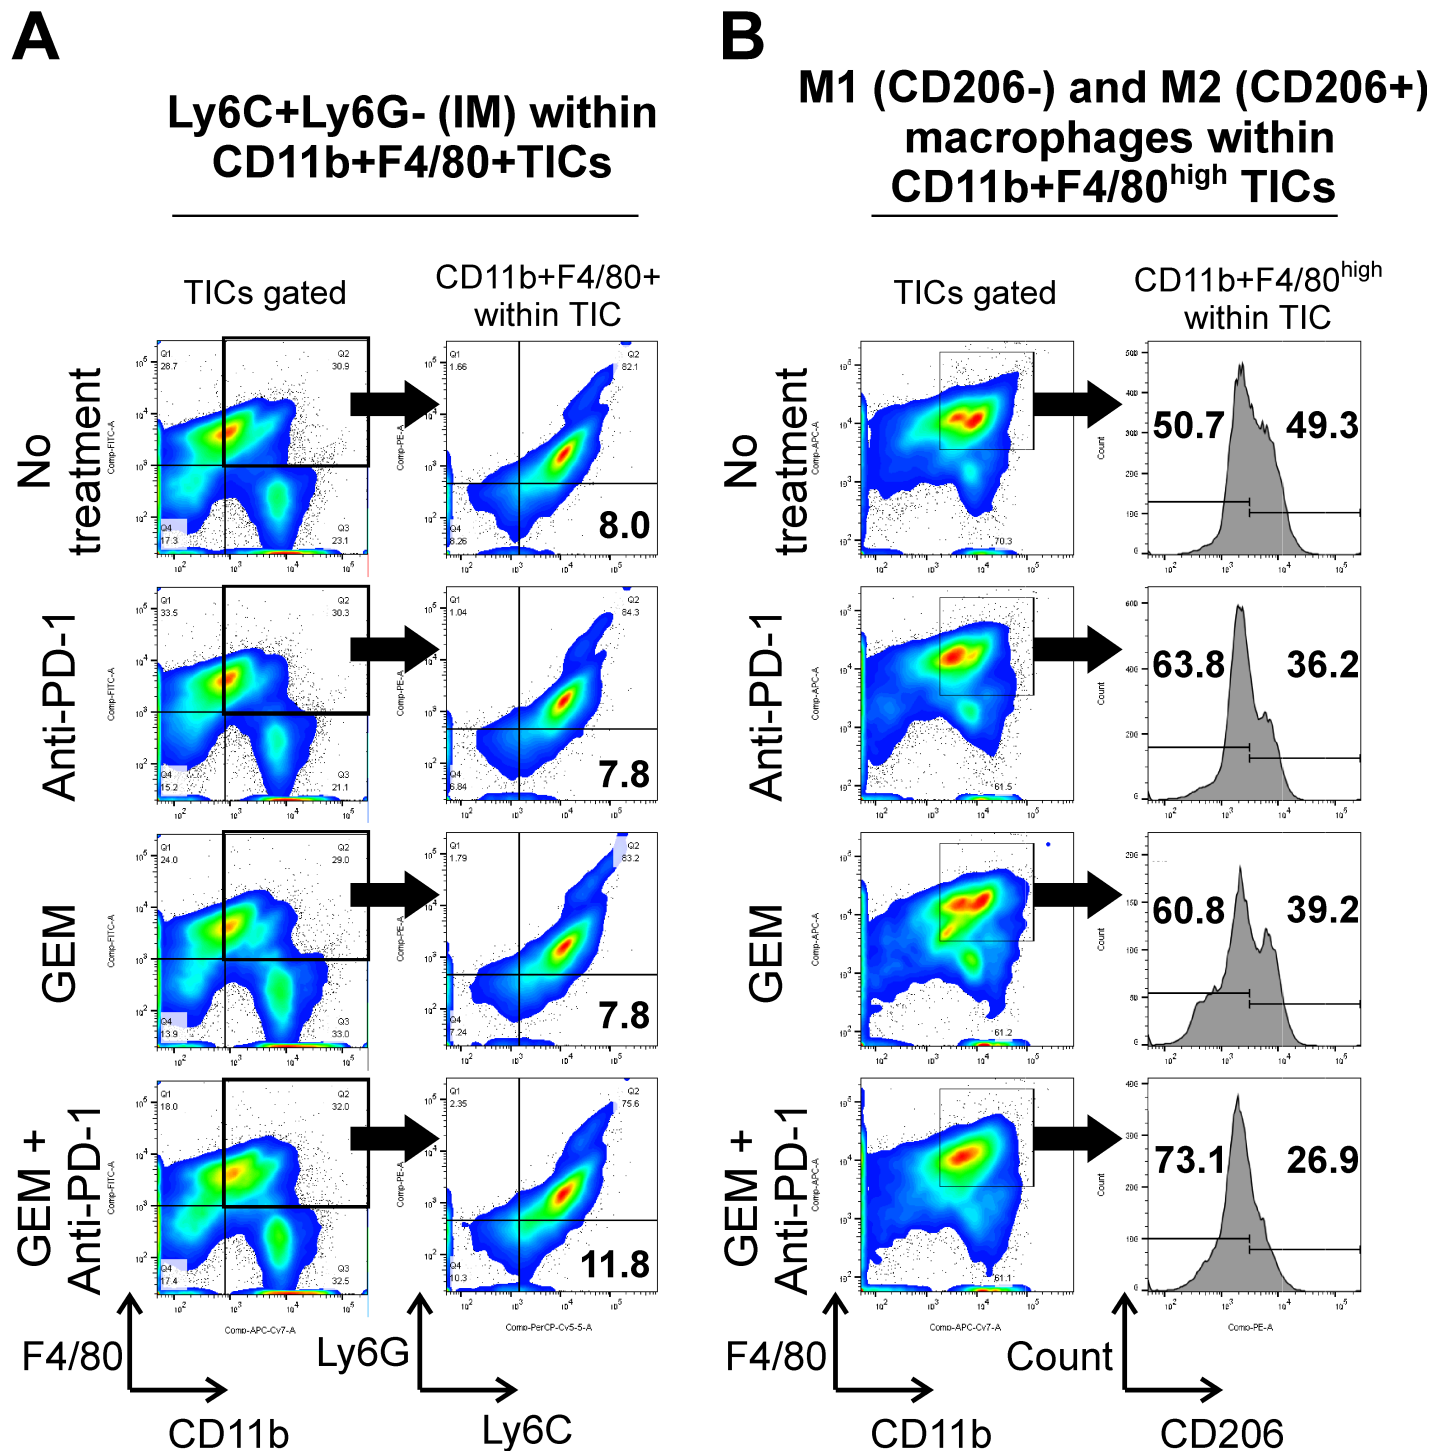

Supplement: jitc-2020-001367supp006.pdf [file jitc-2020-001367supp006.pdf]

# Supplementary Figure S7

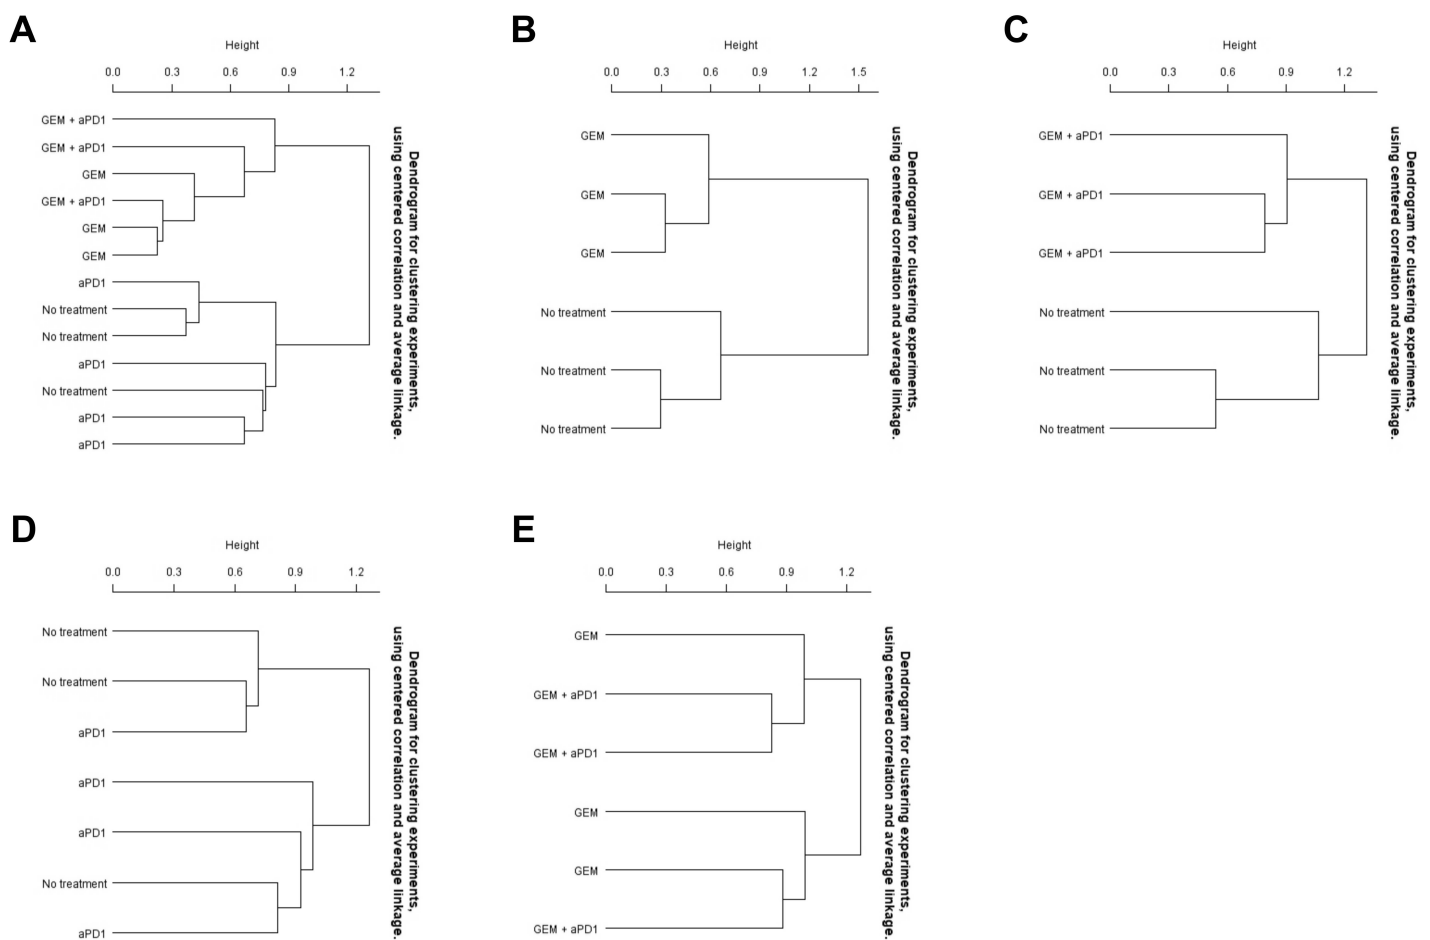

Supplement: jitc-2020-001367supp007.pdf [file jitc-2020-001367supp007.pdf]
